# Supplementary material
Source: ML conference proceedings conference paper supplement (https://openreview.net/forum?id=kWS4iOkhXv)
Supplement: supplementary_material [file attachment]

## A APPENDIX

### A.1 DCP PSEUDOCODE

---

**Algorithm 1** Dynamic Convolutional Partition (DCP)

---

**Input:** Convolutional block  $F : \mathbb{R}^{n_0 \times n_0 \times c_0} \rightarrow \mathbb{R}^{n_\ell \times n_\ell \times c_\ell}$ . Empirically estimated  $N_{\max}$ .

**Output:** Flattened subnetworks  $\mathcal{F} = \left\{ \tilde{f}_{ij}^k \mid i, j \in [d_k], k \in [s] \right\}$ .

```

1: STOP  $\leftarrow$  false,  $s \leftarrow 0$ ,  $C_s \leftarrow \emptyset$ ,  $D = \emptyset$ ,  $R = \emptyset$ ,  $\mathcal{F} \leftarrow \emptyset$ ;
2: while !STOP do
3:    $d \leftarrow 2$ ;
4:   Compute the set of  $d$ -part RIPs of  $n_\ell$ , as  $\mathcal{P}_d \leftarrow R_d^{n_\ell}$ 
5:   for  $r \in \mathcal{P}_d$  do
6:     Compute constraint dimensions for subnetwork indexed by  $(\ell - 2, \ell)$ ;
7:     if Eq. (19) is violated then
8:        $d \leftarrow d + 1$ , restart from Line 4;
9:     else
10:       $s \leftarrow s + 1$ ,  $d_s \leftarrow d$ ,  $r_s \leftarrow r$ ;
11:      while  $\ell \geq 1$  do
12:         $L \leftarrow \ell$ 
13:        Compute constraint dimensions for subnetwork indexed by  $(L - 1, \ell)$ ;
14:        if Eq. (19) is not violated then
15:           $L \leftarrow L - 1$ ;
16:        else
17:           $C_s \leftarrow C_s \cup \{L, \ell\}$ ,  $D \leftarrow D \cup \{d_s\}$ ,  $R \leftarrow R \cup \{r_s\}$ 
18:           $s \leftarrow s + 1$ ,  $\ell \leftarrow L$ ;
19:          Restart from Line 3;
20:        end if
21:      end while
22:      STOP  $\leftarrow$  true;
23:    end if
24:  end for
25: end while
26: Return flattened subnetwork  $\mathcal{F}$  using  $C_s$ ,  $D$  and  $R$ .
```

---

### A.2 PROOF OF THEOREM 4.1.

Focusing on the flattened, partitioned CNN  $F_u$  as defined in Equation (11) and according to the definition of Lipschitz constant based on  $l_2$ -norm, for any two arbitrary inputs of  $F_u$  denoted by  $\mathbf{x}^0$  and  $\mathbf{y}^0$ , we have

$$\|F_u(\mathbf{x}^0) - F_u(\mathbf{y}^0)\|_2^2 = \sum_{i,j=1}^d \left| \tilde{f}_{ij}(\mathbf{x}_{ij}^0) - \tilde{f}_{ij}(\mathbf{y}_{ij}^0) \right|^2 \leq \sum_{i,j=1}^d L(\tilde{f}_{ij}) \|\mathbf{x}_{ij}^0 - \mathbf{y}_{ij}^0\|_2^2. \quad (22)$$

Defining the two vectors:

$$\begin{aligned} \gamma &:= \left[ L(\tilde{f}_{11})^2, L(\tilde{f}_{12})^2, \dots, L(\tilde{f}_{dd})^2 \right]^\top, \\ \underline{\Delta} &:= \left[ \|\mathbf{x}_{11}^0 - \mathbf{y}_{11}^0\|_2^2, \|\mathbf{x}_{12}^0 - \mathbf{y}_{12}^0\|_2^2, \dots, \|\mathbf{x}_{dd}^0 - \mathbf{y}_{dd}^0\|_2^2 \right]^\top, \end{aligned}$$

and applying the Cauchy-Schwartz inequality, we obtain

$$\|F_u(\mathbf{x}^0) - F_u(\mathbf{y}^0)\|_2^2 \leq \langle \gamma, \underline{\Delta} \rangle \leq \|\gamma\|_2 \|\underline{\Delta}\|_2. \quad (23)$$

Given

$$\|\underline{\Delta}\|_2^2 = \sum_{i,j=1}^d \|\mathbf{x}_{ij}^0 - \mathbf{y}_{ij}^0\|_2^4, \quad (24)$$

we observe the following

$$\|\mathbf{x}^0 - \mathbf{y}^0\|_2^4 = \left( \sum_{i,j=1}^d \|\mathbf{x}_{ij}^0 - \mathbf{y}_{ij}^0\|_2^2 \right)^2 = \sum_{i,j=1}^d \|\mathbf{x}_{ij}^0 - \mathbf{y}_{ij}^0\|_2^4 + \zeta = \|\Delta\|_2^2 + \zeta, \quad (25)$$

where  $\zeta$  denotes all the additional non-negative terms from the expansion. This results in

$$\|\Delta\|_2 \leq \|\mathbf{x}^0 - \mathbf{y}^0\|_2^2. \quad (26)$$

Combining (23) and (26), we have

$$\|F_u(\mathbf{x}^0) - F_u(\mathbf{y}^0)\|_2 \leq \sqrt{\|\gamma\|_2} \|\mathbf{x}^0 - \mathbf{y}^0\|_2 = \left( \sum_{i,j=1}^d L(\widetilde{f}_{ij})^4 \right)^{\frac{1}{4}} \|\mathbf{x}^0 - \mathbf{y}^0\|_2. \quad (27)$$

We have shown that  $L(F_u)$  is bounded above by  $\left( \sum_{i,j=1}^d L(\widetilde{f}_{ij})^4 \right)^{\frac{1}{4}}$ , which concludes the proof.

### A.3 PROOF OF COROLLARY 4.2

An  $\ell$ -layer convolutional block is a composite function of the  $s$  subnetworks, as detailed by (13) and (14). From Lemma 3.1, it follows that

$$L(F_u) \leq \prod_{k=1}^s L(F_k^u). \quad (28)$$

Then apply Theorem 4.1 to bound the Lipschitz constant of each subnetwork  $F_k^u$  by

$$L(F_k^u) \leq \left( \sum_{i,j=1}^{d_k} L(\widetilde{f}_{ij}^{(k)})^4 \right)^{\frac{1}{4}}. \quad (29)$$

Substituting (29) into (28) gives the required result:

$$L(F_u) \leq \prod_{k=1}^s L(F_k^u) \leq \prod_{k=1}^s \left( \sum_{i,j=1}^{d_k} L(\widetilde{f}_{ij}^{(k)})^4 \right)^{\frac{1}{4}}. \quad (30)$$

### A.4 PROOF OF PROPOSITION 4.3.

For an  $\ell$ -layer convolutional block with a filter of dimension  $h$  and stride  $s$  applied at each convolutional layer, the formula for computing the output size is:  $n_k = \lfloor \frac{n_{k-1} - h}{s} \rfloor + 1$ , i.e.  $n_{k-1} = s(n_k - \epsilon_k - 1) + h$ , for  $k \in \{1, 2, \dots, \ell\}$  and  $\epsilon_k \in \{0, 1\}$ . The value of  $\epsilon_k$  accounts for if  $\lfloor \cdot \rfloor$  is a non-integer. From this the dimension of the  $k$ -th receptive field can be expressed in terms of  $n_\ell$  as follows

$$n_k = s^{\ell-k} n_\ell + \sum_{i=1}^{\ell-k} (f s^{i-1} - s^i - \epsilon_i s^i), \text{ for } k \in \{0, 1, \dots, \ell-1\}. \quad (31)$$

Similarly, the  $k$ -th receptive field corresponding to the largest convolutional block is given by

$$\rho_k = s^{\ell-k} \rho_* + \sum_{i=1}^{\ell-k} (f s^{i-1} - s^i - \epsilon_i s^i), \text{ for } k \in \{0, 1, \dots, \ell-1\}, \quad (32)$$

where we recall that  $\rho_*$  denotes the dimension of the largest convolutional block in the final layer, resulting from applying a  $d$ -part RIP to  $n_\ell$ .

To obtain (20) and (21), we state a few facts. First the number of equality constraints in (3.2) is one, i.e.  $m = 1$ . Secondly, for deep networks the per-iteration time complexity is dominated by the cubic

term. Using the fact that  $N = \sum_{i=0}^{\ell-1} c_i n_i^2$  and  $N_* = \sum_{i=0}^{\ell-1} c_i \rho_i^2$  for the largest convolutional block, substitution of (31) gives

$$\begin{aligned}
N &= c_{\ell-1} \left[ s n_\ell + \sum_{i=1}^1 (f s^{i-1} - s^i - \epsilon_i s^i) \right]^2 + c_{\ell-2} \left[ s^2 n_\ell + \sum_{i=1}^2 (f s^{i-1} - s^i - \epsilon_i s^i) \right]^2 + \\
&\quad \dots + c_0 \left[ s^\ell n_\ell + \sum_{i=1}^\ell (f s^{i-1} - s^i - \epsilon_i s^i) \right]^2 \\
&= n_\ell^2 \sum_{i=0}^{\ell-1} c_i s^{2(\ell-i)} + 2n_\ell \left[ \sum_{j=1}^\ell c_{\ell-j} s^j \sum_{i=1}^j (f s^{i-1} - s^i - \epsilon_i s^i) \right] + \\
&\quad \sum_{j=1}^\ell c_{\ell-j} \left( \sum_{i=1}^j (f s^{i-1} - s^i - \epsilon_i s^i) \right)^2.
\end{aligned} \tag{33}$$

In an analogous way, we find  $N_*$  to be

$$\begin{aligned}
N_* &= \rho_*^2 \sum_{i=0}^{\ell-1} c_i s^{2(\ell-i)} + 2\rho_* \left[ \sum_{j=1}^\ell c_{\ell-j} s^j \sum_{i=1}^j (f s^{i-1} - s^i - \epsilon_i s^i) \right] + \\
&\quad \sum_{j=1}^\ell c_{\ell-j} \left( \sum_{i=1}^j (f s^{i-1} - s^i - \epsilon_i s^i) \right)^2.
\end{aligned} \tag{34}$$

To simplify the notation, let  $a_0, a_1, a_2$  denote the first, second and third summation terms in (33) respectively- and likewise for (34). Then by considering the cubic binomial expansion of  $N_*/N$ , we obtain the following

$$\left( \frac{N_*}{N} \right)^3 = \frac{a_0^3 \rho_*^6 + 8a_1^3 \rho_*^3 + a_2^3 + \zeta_1}{a_0^3 n_\ell^6 + 8a_1^3 n_\ell^3 + a_2^3 + \zeta_2}, \tag{35}$$

where  $\zeta_1$  and  $\zeta_2$  denote lower order terms. Using the fact that there exist  $b_0, b_1 > a_0$  such that  $a_0^3 n_\ell^6 \leq N^3 \leq b_0^3 n_\ell^6$  and  $a_0^3 \rho_*^6 \leq N_*^3 \leq b_1^3 \rho_*^6$ , then (35) is bounded above as follows

$$\left( \frac{N_*}{N} \right)^3 \leq \left( \frac{b_1}{a_0} \right)^3 \left( \frac{\rho_*}{n_\ell} \right)^6. \tag{36}$$

To derive the results in (20) and (21) we use the fact that  $\lceil \frac{n_\ell}{d} \rceil \leq \rho_* \leq n_\ell - (d-1)$  and consider the two following cases:

**Case I.** When  $d = n_\ell$ ,  $\rho_*$  can be at most 1. Substituting this value into (36) gives:

$$\left( \frac{N_*}{N} \right)^3 \leq \left( \frac{b_1}{a_0} \right)^3 \frac{1}{n_\ell^6} = O\left( \frac{1}{n_\ell^6} \right), \text{ as } n_\ell \rightarrow \infty. \tag{37}$$

**Case II.** When  $d = 2$ ,  $\rho_*$  can be at most  $\lceil \frac{n_\ell}{2} \rceil$ . Substituting this value into (36) gives:

$$\left( \frac{N_*}{N} \right)^3 \leq \left( \frac{b_1}{a_0} \right)^3 \frac{1}{2^6} = O(1). \tag{38}$$

## A.5 ADDITIONAL INFORMATION AND EXPERIMENTS

### A.5.1 $N_{\max}$ ESTIMATION

The estimation of  $N_{\max}$  involves generating multiple SDPs of increasing size and recording the constraint size for which computational bottlenecks. Averaging over these instances will give an estimation for  $N_{\max}$ . While this approximation will be tight, it is computationally expensive as the problem size for which bottlenecks are reached, is not known a priori.

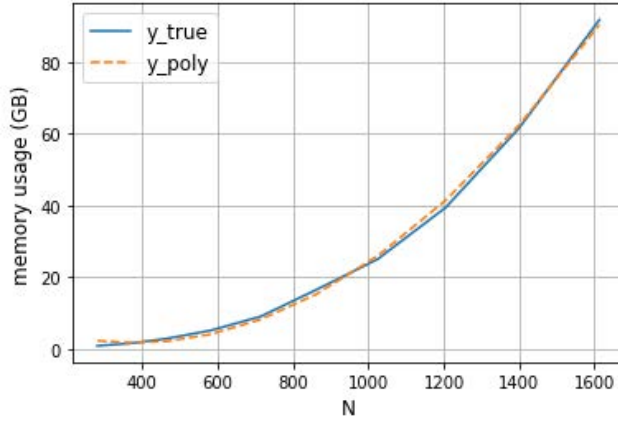

Figure 3: Memory usage for increasing problem dimensions.

As an alternative, we implement a prediction-based method, which may give a more conservative estimate of  $N_{\max}$  but is computationally cheaper. It runs LipSDP on several small to medium sized problems, recording the memory usage. Using the collected data,  $N_{\max}$  is estimated via extrapolation. While this still involves multiple calls of LipSDP, it avoids having to increment the problem size until computational bottlenecks, which isn't known a priori, and is thus more efficient. In Figure 3, we show the recorded memory usage of the solver for increasing problem sizes ( $y_{\text{true}}$ ) and compared against a quadratic fit of the data ( $y_{\text{poly}}$ ). Using the approximating polynomial, we extrapolated the value of  $N_{\max}$  based on a maximum memory capacity of 120GB of RAM, which gave a value of 1800. We chose a more conservative value than this in practice, i.e.,  $N_{\max} = 1400$ , to account for memory associated with additional computations and running the operating system.

#### A.5.2 PROVABLY 1-LIPSCHITZ NETWORK

To further assess the effectiveness of the DCP method, we apply it to provably 1-Lipschitz networks. As mentioned in (Anil et al., 2019), a provably 1-Lipschitz network is one which is composed of 1-Lipschitz affine transformations and activations. To this end, we consider a 2-layer convolutional block with an input dimension of  $28 \times 28$ , followed by two convolutional layers of sizes  $12 \times 12 \times c$  and  $4 \times 4 \times 1$ , where the number of channels,  $c$ , varies from 1 to 3. We used the ReLU activation function that is 1-Lipschitz, and orthogonalised the weight matrices. The results are shown in Table 2. LipSDP gives estimated upper-bounds less than 1, which we conjecture is due to the approximation error underpinning the SDP formulation. DCP-LipSDP gives an upper-bound on the LipSDP values.

---

Table 2: Comparison of Lipschitz estimation for provably 1-Lipschitz, 2-layer convolutional blocks of size  $28 \times 28 \rightarrow 12 \times 12 \times c \rightarrow 4 \times 4$ .

| Channel Number ( $c$ ) | LipSDP | DCP-LipSDP |
|------------------------|--------|------------|
| 1                      | 0.85   | 1.03       |
| 2                      | 0.63   | 0.79       |
| 3                      | 0.64   | 0.82       |
